# Supplementary material for: Assessment of fetal exposure and maternal elimination of perfluoroalkyl substances
Source: Royal Society of Chemistry journal article supplement (doi:10.1039/c4em00129j), 2014-01-01
Supplement: c4em00129j1.pdf [file c4em00129j1.pdf]

**Supplementary Material**

**Assessment of fetal exposure and maternal elimination to  
perfluoroalkyl substances**

Tao Zhang,<sup>\*ab</sup> Xiaolei Qin,<sup>b</sup>

<sup>a</sup> School of Environmental Science and Engineering; Guangdong Provincial Key  
Laboratory of Environmental Pollution Control and Remediation Technology, Sun  
Yat-Sen University, Guangzhou 510275, China

<sup>b</sup> College of Environmental Sciences and Engineering, Ministry of Education Key  
Laboratory of Pollution Processes and Environmental Criteria, Nankai University,  
Tianjin 300071, China

**\*Corresponding Author:**

**Tao Zhang**  
**School of Environmental Science and Engineering, Sun Yat-Sen University**  
**135 Xingang West Street, Guangzhou, 510275, China**  
**Tel: 86-22-84113454**  
**Email: taozhang.swiss@gmail.com**

**Submission to: Environmental Science: Processes & Impacts**

24       **Reagents and Chemicals.** All reagents used for the analysis of poly- and  
25 perfluoroalkyl substances (PFASs) were of trace analysis grade. Methyl tert-butyl  
26 ether (MTBE) and methanol were purchased from Dima Technology Inc (Richmond  
27 Hill, ON, Canada). Sodium carbonate, sodium bicarbonate, ammonium acetate,  
28 ammonium hydroxide and tetrabutyl ammonium hydrogen sulfate (TBAHS) used as  
29 ion-pair reagent were obtained from Aldrich (St Louis, MO, USA).

30       PFASs were purchased from following: potassium salt of perfluorobutane  
31 sulfonate (PFBS), potassium salt of perfluorohexane sulfonate (PFHxS), potassium  
32 salt of perfluorooctane sulfonate (PFOS), and perfluorododecanoic acid (PFDoDA)  
33 were purchased from Aldrich (St Louis, MO, USA); perfluoropentanoic acid (PFPeA),  
34 perfluorohexanoic acid (PFHxA), perfluoroheptanoic acid (PFHpA) and  
35 perfluoroundecanoic acid (PFUnDA) were purchased from Matrix Scientific  
36 (Columbia, SC, USA); Perfluorononanoic acid (PFNA) and perfluorodecanoic acid  
37 (PFDA) were purchased from Fluorochem (Derbyshire, UK); perfluorooctanoic acid  
38 (PFOA) was purchased from Strem Chemicals (Bischheim, France). Two internal  
39 standards used in this study, including perfluoro-n-[<sup>13</sup>C<sub>8</sub>]octanoic acid (M8PFOA),  
40 sodium perfluoro-1-[1,2,3,4-<sup>13</sup>C<sub>8</sub>]octanesulfonate (MPFOS), were purchased from  
41 Wellington Laboratories (Guelph, ON, Canada). Purities of all standards were ≥ 95%.

42       Oasis WAX extraction cartridges (3cc, 60 mg) were purchased from Waters  
43 Company (Milford, MA, USA). The Envi-carbon particle was obtained from Supelco  
44 (Bellefonte, PA, USA).

**Sample Preparation.** Maternal blood (MB), cord blood (CB) and placenta: Prior to extraction, samples of whole blood and placenta were thawed and allowed to return to room temperature; and approximately 10 g fresh weight full thickness placenta samples from multiple sites were freeze-dried with a Telstar Laboratory freeze-dryer Cryodos-80 for 24 h, then dried placenta samples were homogenized, the moisture content of the placenta was recorded to enable reporting of PFAS concentrations on a fresh weight basis. Prior to freeze-drying samples, all placenta samples were washed by using Milli-Q water. Blood and homogenized placenta samples were extracted by ion-pairing method similar to that described by Hansen et al. with some modifications. One milliliter of blood sample (or 0.15 to 0.20 g dry weight homogenized placenta) was added to a 15 mL polypropylene (PP) tube, 5.0 ng of internal standards (MPFOS and M8PFOA, 50  $\mu\text{L}$ , 0.10  $\text{ng } \mu\text{L}^{-1}$ ), 2.0 mL of 0.25 M sodium carbonate buffer and 1.0 mL of 0.5 M TBAHS (adjusted to pH 10) were added. After thorough mixing, the extraction was carried out by the addition of 5 mL of MTBE, and the mixture was shaken vigorously for 40 min. The organic layer were separated from the aqueous layer by centrifugation at 3800 ( $\times g$ ) for 5 min and then transferred into a new 15 mL PP-tube. The extraction procedure was repeated with 3 mL of MTBE; the mixture was shaken vigorously for 20 min and combined with the first fraction. The solvent was evaporated to near-dryness under a gentle stream of high-purity nitrogen and then reconstituted with 1.0 mL of methanol. After centrifugation at 3800 ( $\times g$ ) for 2 min, the solution were transferred into an

66 autosampler vial for UPLC-MS/MS (Waters Acquity ultra performance liquid  
67 chromatography equipped with Waters Acquity TQD triple quadrupole mass  
68 spectrometer) analysis.

69 Amniotic fluid (AF): A total of 20 to 50 mL of AF sample was transferred into  
70 a 50 mL PP-tube, and then spiked with 3 ng (30  $\mu$ L, 0.10 ng  $\mu$ L<sup>-1</sup>) of each internal  
71 standard (MPFOS and M8PFOA). The spiked samples were extracted using Oasis  
72 WAX extraction cartridges. Prior to loading of the samples, the WAX cartridges were  
73 conditioned with 4 mL of 0.1% ammonium hydroxide in methanol, and 4 mL of milli-  
74 Q water. The samples were loaded on the conditioned cartridge at a rate of 3 mL min<sup>-1</sup>.  
75 The cartridges were then washed with 4 mL of 25 mM sodium acetate buffer (pH = 4).  
76 Then, the target fraction was eluted with 3 mL of 0.1% ammonium hydroxide in  
77 methanol with gravity drop. One hundred and fifty milligram of Envi-carbon particle  
78 was added into elutes. Then, elutes was performed by shaking the slurry for 10 min,  
79 and centrifugation at 3800 ( $\times$ g) for 8 min. Finally, the extracted solutions were  
80 transferred into an autosampler vial for UPLC-MS/MS analysis.

81 **Instrumental Analysis.** Concentrations of 11 PFASs, PFBS, PFHxS, PFOS,  
82 PFPeA, PFHxA, PFHpA, PFOA, PFNA, PFDA, PFUnDA, PFDoDA were  
83 determined by using Waters Acquity UPLC-MS/MS. Aliquots of five microliters  
84 were injected into ACQUITY UPLC BEH C<sub>18</sub> column (2.1  $\times$  50 mm, Waters, Ireland)  
85 at a flow rate of 0.40 mL min<sup>-1</sup>. The two mobile phases were methanol (A) and 2 mM  
86 ammonium acetate in milli-Q water (B), with an initial gradient of 25% A; it was hold

87 at 25% A for 0.5 min; the gradient increased to 85% A at 5 min; then continuously  
88 increased to 100% in 0.1 min; it was hold at 100% A for 1.9 min, and then reverted to  
89 25% A at 9 min; the total running time is 9 min. The MS-MS was operated in  
90 electrospray negative ionization mode. The parameters were: Capillary voltage at  $-2.7$   
91 kV, source temperature at  $150\text{ }^{\circ}\text{C}$  for all target compounds; desolvation temperature at  
92  $350\text{ }^{\circ}\text{C}$ ; cone gas flow  $20\text{ L hr}^{-1}$ ; desolvation gas flow  $700\text{ L hr}^{-1}$ . The MS/MS was  
93 operated in a multiple reaction monitoring (MRM) mode; the mass transitions  
94 monitored were:  $299.1 > 80.0$  for PFBS,  $399.2 > 80.0$  for PFHxS,  $499.2 > 99.0$  for  
95 PFOS,  $263.2 > 219.1$  for PFPeA,  $313.2 > 269.1$  for PFHxA,  $363.2 > 319.1$  for PFHpA,  
96  $413.2 > 369.1$  for PFOA,  $463.2 > 419.1$  for PFNA,  $513.2 > 469.1$  for PFDA,  $563.2 >$   
97  $519.1$  for PFUnDA,  $613.2 > 569.1$  for PFDoDA,  $421.2 > 376.1$  for M8PFOA,  $503.2 >$   
98  $80.0$  for MPFOS. When possible, multiple daughter ions were monitored for  
99 confirmation, but quantitation was based on a single product ion.

100 **Quality Control and Assurance.** Recoveries of the PFASs (10 ng each)  
101 spiked into sample matrices ranged from  $70 \pm 8\%$  to  $141 \pm 17\%$  for placenta ( $n = 3$ )  
102 and from  $84 \pm 12\%$  to  $135 \pm 1\%$  for whole blood ( $n = 5$ ). A few exceptions with low  
103 recovery were noted: perfluorobutane sulfonate (PFBS) in placenta and whole blood  
104 showed abnormal recovery ( $< 50\%$ ). As internal standards, sodium perfluoro-1-  
105  $[1,2,3,4\text{-}^{13}\text{C}_8]$ octanesulfonate (MPFOS) and perfluoro- $n\text{-}[^{13}\text{C}_8]$ octanoic acid  
106 (M8PFOA) were spiked (5.0 ng each) into all samples prior to extraction. Respective  
107 mean recoveries of MPFOS and M8PFOA were  $81 \pm 7\%$  and  $78 \pm 6\%$  for placenta

108 and  $102 \pm 7\%$  and  $98 \pm 9\%$  for whole blood (**Table S2**). Method precision was good,  
109 with relative standard deviations (RSDs) for each sample matrix were in the range of  
110 1 to 17% for all PFASs (**Table S2**).

111 The recoveries of PFOS and PFOA were  $55 \pm 8\%$  and  $57 \pm 9\%$  ( $n = 3$ ),  
112 respectively (**Table S2**), in AF. Although the recoveries of PFOS and PFOA were low  
113 for AF, corresponding internal standards (i.e., MPFOS and M8PFOA) were spiked  
114 (level:  $0.10 \text{ ng mL}^{-1}$  in AF;  $n = 29$ ) into all samples before extraction. The mean  
115 recoveries of MPFOS and M8PFOA were  $49 \pm 4\%$  and  $53 \pm 9\%$ , respectively (**Table**  
116 **S2**). The concentrations of PFOS and PFOA in AF samples were corrected by the  
117 recoveries of the corresponding internal standard. Method precision was good for all  
118 PFASs in AF (RSDs  $< 10\%$ ) (**Table S2**). The limit of quantitation (LOQ) was  
119 determined as the lowest concentration of PFC in calibration curve which measured  
120 concentration of calibration standards were 70% to 130% of the theoretical  
121 concentrations. The LOQs of PFASs were  $0.05 \text{ ng g}^{-1}$  fresh weight (fw) for placenta,  
122 and  $0.05 \text{ ng mL}^{-1}$  for blood; the LOQs of PFASs in AF ranged from 0.01 to  $0.03 \text{ ng}$   
123  $\text{mL}^{-1}$  (**Table S2**).

**Table S1** Characteristics of investigated pregnant women and their fetuses.

|                                        | <b>N</b> | <b>range</b>         | <b>mean</b> | <b>SD</b> | <b>median</b> |
|----------------------------------------|----------|----------------------|-------------|-----------|---------------|
| <i>Pregnant Women</i>                  |          |                      |             |           |               |
| age (year)                             | 27       | 21-39                | 30.9        | 3.44      | 30.0          |
| predelivery weight (kg)                | 27       | 59-105               | 74.7        | 9.06      | 73.3          |
| postdelivery weight (kg)               | 27       | 52-92                | 68.8        | 8.61      | 67.8          |
| BMI <sup>a</sup> (kg m <sup>-2</sup> ) | 27       | 19.6-47.3            | 28.6        | 4.48      | 26.8          |
| parity <sup>b</sup>                    | 27       | 0-1                  | 0.18        | 0.28      | 0             |
| gestational age at delivery (wks)      | 27       | 35-47                | 40.3        | 2.3       | 39.0          |
| <i>Matched Newborn Babies</i>          |          |                      |             |           |               |
| BMI (kg m <sup>-2</sup> )              | 27       | 9.96-15.2            | 12.6        | 1.46      | 12.6          |
| head circumference (cm)                | 27       | 31-35                | 33.3        | 1.05      | 34.0          |
| chest circumference (cm)               | 27       | 30-35                | 32.8        | 1.04      | 33.0          |
| sex                                    | 27       | male: 13, female: 14 |             |           |               |

<sup>a</sup> BMI = Body Mass Index, BMI were calculated based on predelivery weight; <sup>b</sup> 82% of pregnant women were primiparous women.

**Table S2** The limit of quantitation (LOQ, ng/mL) and mean recoveries (%) of native standards and <sup>13</sup>C-labeled internal standards spiked into each category of samples

|                                                 | Native Standards |       |      |       |       |       |      |      |      |        |        | Internal Standards |        |
|-------------------------------------------------|------------------|-------|------|-------|-------|-------|------|------|------|--------|--------|--------------------|--------|
|                                                 | PFBS             | PFHxS | PFOS | PFPeA | PFHxA | PFHpA | PFOA | PFNA | PFDA | PFUnDA | PFDODA | MPFOS              | M8PFOA |
| <i>LOQ of PFASs in whole blood and placenta</i> |                  |       |      |       |       |       |      |      |      |        |        |                    |        |
|                                                 | 0.05             | 0.05  | 0.05 | 0.05  | 0.05  | 0.05  | 0.05 | 0.05 | 0.05 | 0.05   | 0.05   | 0.05               | 0.05   |
| <i>LOQ of PFASs in amniotic fluid</i>           |                  |       |      |       |       |       |      |      |      |        |        |                    |        |
|                                                 | NC <sup>b</sup>  | NC    | 0.03 | NC    | NC    | NC    | 0.01 | NC   | NC   | NC     | NC     | 0.03               | 0.01   |
| <i>Whole blood</i>                              |                  |       |      |       |       |       |      |      |      |        |        |                    |        |
| Mean                                            | 43               | 102   | 84   | 107   | 96    | 93    | 117  | 102  | 135  | 102    | 133    | 102                | 98     |
| RSDs <sup>a</sup>                               | 2                | 3     | 12   | 13    | 1     | 1     | 7    | 2    | 1    | 2      | 4      | 7                  | 9      |
| <i>Placenta</i>                                 |                  |       |      |       |       |       |      |      |      |        |        |                    |        |
| Mean                                            | 35               | 97    | 70   | 118   | 138   | 120   | 111  | 134  | 141  | 115    | 139    | 81                 | 78     |
| RSDs                                            | 1                | 17    | 8    | 17    | 17    | 8     | 10   | 11   | 17   | 12     | 16     | 5                  | 6      |
| <i>Amniotic fluid</i>                           |                  |       |      |       |       |       |      |      |      |        |        |                    |        |
| Mean                                            | NC               | NC    | 55   | NC    | NC    | NC    | 57   | NC   | NC   | NC     | NC     | 50                 | 53     |
| RSDs                                            | NC               | NC    | 8    | NC    | NC    | NC    | 9    | NC   | NC   | NC     | NC     | 4                  | 9      |

<sup>a</sup> RSDs = relative standard deviations; <sup>b</sup> NC = not calculated.
